# Supplementary material for: Neuronal GPCR OCTR-1 regulates innate immunity by controlling protein synthesis in Caenorhabditis elegans
Source: PubMed Central journal article supplement (PMC5104976; doi:10.1038/srep36832), 2016-11-11
Supplement: srep36832-s1.pdf [file srep36832-s1.pdf]

## Supplementary Information

### Neuronal GPCR OCTR-1 regulates innate immunity by controlling protein synthesis in *Caenorhabditis elegans*

Yiyong Liu<sup>1</sup>, Durai Sellegounder<sup>1</sup>, and Jingru Sun<sup>1\*</sup>

<sup>1</sup>Department of Biomedical Sciences, Elson S. Floyd College of Medicine, Washington State University, Spokane, Washington, USA

\*Corresponding. [jingru.sun@wsu.edu](mailto:jingru.sun@wsu.edu)

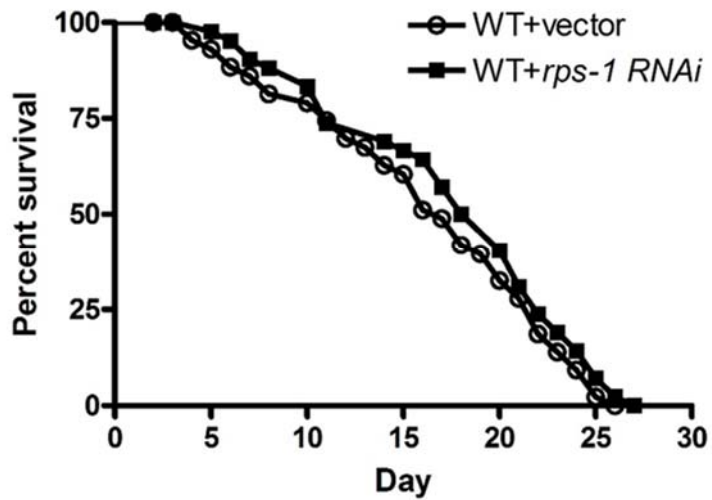

**Figure S1:** Wild-type animals treated with *rps-1* RNAi have a lifespan similar to that of wild-type animals treated with empty vector control RNAi. Wild-type animals grown on double-stranded RNA (dsRNA) for vector control or dsRNA for *rps-1* were scored for survival over time. WT+vector versus WT+*rps-1* RNAi,  $p = 0.2879$ . The survival graph represents assays of two independent experiments.  $n = 45$  animals per strain.

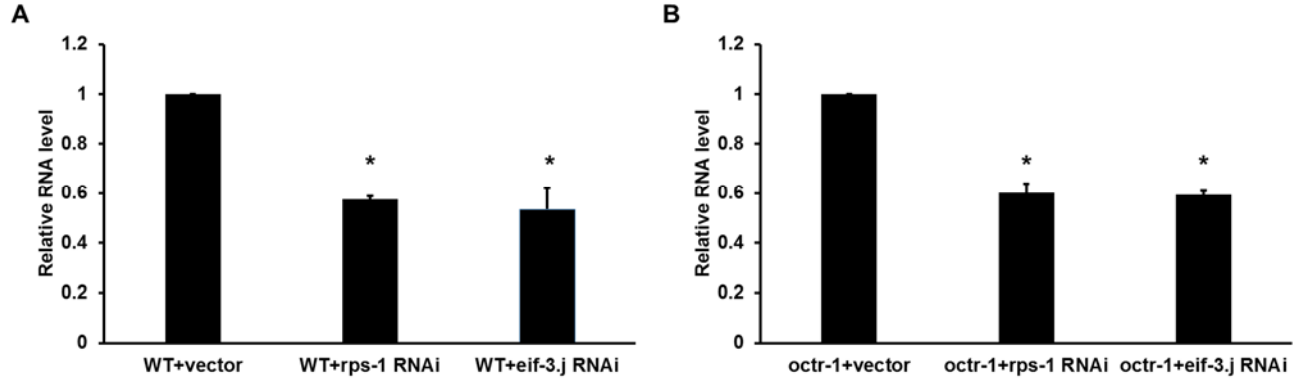

**Figure S2:** *rps-1* RNAi and *eif-3.j* RNAi in wild-type and *octr-1(ok371)* animals. **(A)** qRT-PCR analysis of expression of *rps-1* and *eif-3.j* in wild-type animals. Bars represent mean  $\pm$  SEM.  $n = 3$  independent experiments. \* denotes a significant difference ( $p < 0.001$ ) between the means of the WT+RNAi animals and the WT+vector animals. **(B)** qRT-PCR analysis of expression of *rps-1* and *eif-3.j* in *octr-1(ok371)* animals. Bars represent mean  $\pm$  SEM.  $n = 3$  independent experiments. \* denotes a significant difference ( $p < 0.001$ ) between the means of the octr-1+RNAi animals and the octr-1+vector animals.

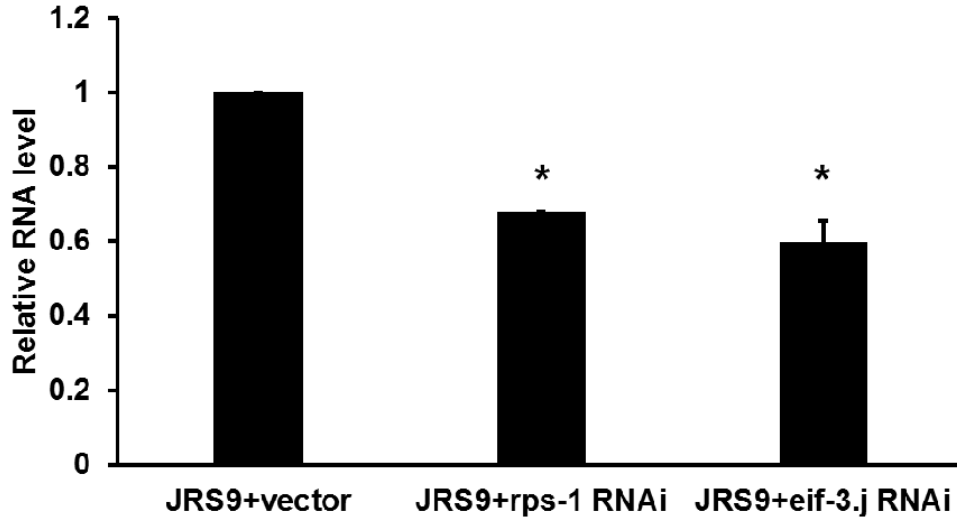

**Figure S3:** *rps-1* RNAi and *eif-3.j* RNAi in JRS9 (*octr-1(ok371);Phsp-4::GFP(zcls4)*) animals. qRT-PCR analysis of expression of *rps-1* and *eif-3.j* in JRS9 animals. Bars represent mean  $\pm$  SEM.  $n = 3$  independent experiments. \* denotes a significant difference ( $p < 0.001$ ) between the means of the JRS9+RNAi animals and the JRS9+vector animals.

**Table S1.** Proteins downregulated in wild-type N2 animals upon *P. aeruginosa* infection

| <b>Protein</b> | <b>Gene ID</b>   | <b>Fold Change<sup>#</sup></b> | <b>p-value</b> |
|----------------|------------------|--------------------------------|----------------|
| GRD-14         | <i>t01b10.2</i>  | only in the uninfected         |                |
| C05C8.7        | <i>c05c8.7</i>   | only in the uninfected         |                |
| GPX-5          | <i>c11e4.1</i>   | only in the uninfected         |                |
| HACD-1         | <i>r09b5.6</i>   | only in the uninfected         |                |
| Y54G11A.7      | <i>y54g11a.7</i> | only in the uninfected         |                |
| Y43F8C.13      | <i>y43f8c.13</i> | only in the uninfected         |                |
| Y49E10.18      | <i>y49e10.18</i> | only in the uninfected         |                |
| BAF-1          | <i>b0464.7</i>   | only in the uninfected         |                |
| CLEC-5         | <i>c35d10.14</i> | only in the uninfected         |                |
| SEC-24.2       | <i>zc518.2</i>   | only in the uninfected         |                |
| ZK1320.2       | <i>zk1320.2</i>  | only in the uninfected         |                |
| NDX-2          | <i>w02g9.1</i>   | only in the uninfected         |                |
| CYTB-5.2       | <i>w02d3.1</i>   | only in the uninfected         |                |
| THN-2          | <i>f28d1.5</i>   | only in the uninfected         |                |
| F28B4.3        | <i>f28b4.3</i>   | 5.8                            | 0.009336       |
| C49C3.4        | <i>C49c3.4</i>   | 3.2                            | 0.00538        |

# only in the uninfected: the protein was only detected in the uninfected wild-type N2 animals, not in the infected wild-type N2 animals.

**Table S2.** Proteins upregulated in *octr-1(ok371)* animals upon *P. aeruginosa* infection

| Protein          | Gene ID          | Fold Change <sup>#</sup> | p-value  |
|------------------|------------------|--------------------------|----------|
| METR-1           | <i>r03d7.1</i>   | only in the infected     |          |
| DOD-24           | <i>c32h11.12</i> | only in the infected     |          |
| <i>F20D6.11</i>  | <i>f20d6.11</i>  | only in the infected     |          |
| <i>M60.2</i>     | <i>m60.2</i>     | only in the infected     |          |
| <i>F55G11.2</i>  | <i>f55g11.2</i>  | only in the infected     |          |
| CPG-2            | <i>b0280.5</i>   | only in the infected     |          |
| SKPO-1           | <i>f49e12.1</i>  | only in the infected     |          |
| RUVB-1           | <i>c27h6.2</i>   | only in the infected     |          |
| <i>F55G11.4</i>  | <i>f55g11.4</i>  | only in the infected     |          |
| <i>D1054.11</i>  | <i>d1054.11</i>  | only in the infected     |          |
| <i>C32H11.4</i>  | <i>c32h11.4</i>  | only in the infected     |          |
| <i>C29E4.12</i>  | <i>c29e4.12</i>  | only in the infected     |          |
| <i>C14C6.5</i>   | <i>c14c6.5</i>   | only in the infected     |          |
| <i>C33A12.1</i>  | <i>c33a12.1</i>  | only in the infected     |          |
| <i>Y18D10A.9</i> | <i>y18d10a.9</i> | only in the infected     |          |
| <i>T23D8.3</i>   | <i>t23d8.3</i>   | only in the infected     |          |
| DOD-17           | <i>k10d11.1</i>  | only in the infected     |          |
| LYS-2            | <i>y22f5a.5</i>  | only in the infected     |          |
| C01G10.9         | <i>c01g10.9</i>  | only in the infected     |          |
| C29G2.6          | <i>c29g2.6</i>   | only in the infected     |          |
| HMG-11           | <i>t05a7.4</i>   | only in the infected     |          |
| C17H12.8         | <i>c17h12.8</i>  | only in the infected     |          |
| CAT-4            | <i>f32g8.6</i>   | only in the infected     |          |
| CLEC-67          | <i>f56d6.2</i>   | only in the infected     |          |
| CLEC-66          | <i>f35c5.9</i>   | only in the infected     |          |
| SRP-6            | <i>c03g6.19</i>  | only in the infected     |          |
| KIN-10           | <i>t01g9.6</i>   | only in the infected     |          |
| GST-38           | <i>f35e8.8</i>   | only in the infected     |          |
| SNA-1            | <i>w02f12.6</i>  | only in the infected     |          |
| T22C1.6          | <i>t22c1.6</i>   | only in the infected     |          |
| F29C4.2          | <i>f29c4.2</i>   | only in the infected     |          |
| CD4.3            | <i>cd4.3</i>     | only in the infected     |          |
| F35E12.6         | <i>f35e12.6</i>  | only in the infected     |          |
| IRG-3            | <i>f53e10.4</i>  | only in the infected     |          |
| GST-5            | <i>r03d7.6</i>   | 9.5                      | 0.006983 |
| K07H8.10         | <i>k07h8.10</i>  | 8.2                      | 1.56E-05 |
| PUD-1.1          | <i>f15e11.13</i> | 7.4                      | 0.004199 |
| ASP-14           | <i>k10c2.3</i>   | 7.2                      | 0.005772 |
| HRP-1            | <i>f42a6.7</i>   | 5.5                      | 6.47E-05 |
| MMCM-1           | <i>zk1058.1</i>  | 5.4                      | 0.004868 |

|           |                   |     |          |
|-----------|-------------------|-----|----------|
| F55B11.2  | <i>f55b11.2</i>   | 4.4 | 0.009808 |
| Y41C4A.11 | <i>y41c4a.11</i>  | 4.3 | 0.001836 |
| PUD-2.1   | <i>f15e11.1</i>   | 4.2 | 0.000795 |
| CTH-2     | <i>zk1127.10</i>  | 4.1 | 0.006442 |
| GST-7     | <i>f11g11.2</i>   | 3.9 | 0.009306 |
| GLB-1     | <i>zk637.13</i>   | 3.9 | 0.000373 |
| CLEC-63   | <i>f35c5.6</i>    | 3.5 | 0.006046 |
| F59B1.2   | <i>f59b1.2</i>    | 3.3 | 0.001724 |
| T13F2.2   | <i>t13f2.2</i>    | 3.3 | 0.001735 |
| DNC-2     | <i>c28h8.12</i>   | 3.2 | 0.0033   |
| SDHA-2    | <i>c34b2.7</i>    | 3.2 | 0.008798 |
| F32A11.3  | <i>f32a11.3</i>   | 3.2 | 0.009824 |
| RPB-2     | <i>c26e6.4</i>    | 3.1 | 3.22E-05 |
| F28H7.3   | <i>f28h7.3</i>    | 3.0 | 0.001857 |
| Y47G6A.21 | <i>y47g6a.21</i>  | 2.8 | 0.001912 |
| GST-4     | <i>k08f4.7</i>    | 2.8 | 0.009806 |
| C36A4.4   | <i>c36a4.4</i>    | 2.7 | 0.004171 |
| GCS-1     | <i>f37b12.2</i>   | 2.7 | 0.008723 |
| KLO-1     | <i>c50f7.10</i>   | 2.6 | 0.001736 |
| F45H10.3  | <i>f45h10.3</i>   | 2.6 | 0.007795 |
| RPB-9     | <i>y97e10ar.5</i> | 2.5 | 0.00686  |
| C42D4.1   | <i>c42d4.1</i>    | 2.5 | 0.001481 |
| Y45F10C.4 | <i>y45f10c.4</i>  | 2.5 | 0.007357 |
| F58H1.3   | <i>f58h1.3</i>    | 2.5 | 8.81E-05 |
| MRPL-12   | <i>w09d10.3</i>   | 2.5 | 0.005091 |
| SKR-3     | <i>f44g3.6</i>    | 2.3 | 0.006315 |
| F13H6.3   | <i>f13h6.3</i>    | 2.3 | 0.00469  |
| C14B9.2   | <i>c14b9.2</i>    | 2.3 | 0.001525 |
| CYSL-2    | <i>k10h10.2</i>   | 2.3 | 0.000171 |
| HSP-4     | <i>f43e2.8</i>    | 2.2 | 0.001997 |
| ATP-4     | <i>t05h4.12</i>   | 2.2 | 0.005098 |
| MBF-1     | <i>h21p03.1</i>   | 2.2 | 0.007713 |
| MTSS-1    | <i>par2.1</i>     | 2.1 | 0.009034 |
| RPL-18    | <i>y45f10d.12</i> | 2.1 | 0.005226 |
| RPS-10    | <i>d1007.6</i>    | 2.1 | 0.005219 |
| C45B2.1   | <i>c45b2.1</i>    | 2.1 | 0.001643 |
| C27H6.8   | <i>c27h6.8</i>    | 2.1 | 0.005811 |
| H28O16.1  | <i>h28o16.1</i>   | 2.1 | 0.001716 |
| Y71F9AL.9 | <i>y71f9al.9</i>  | 2.1 | 0.000421 |
| CEY-4     | <i>y39a1c.3</i>   | 2.0 | 0.000105 |
| C39D10.7  | <i>c39d10.7</i>   | 2.0 | 0.006913 |
| DDP-1     | <i>y39a3cr.4</i>  | 2.0 | 0.000334 |
| TAX-6     | <i>c02f4.2</i>    | 2.0 | 0.008339 |

|           |                   |     |          |
|-----------|-------------------|-----|----------|
| DPY-30    | <i>zk863.6</i>    | 2.0 | 0.004345 |
| RPL-13    | <i>c32e8.2</i>    | 2.0 | 0.007937 |
| Y25C1A.13 | <i>y25c1a.13</i>  | 2.0 | 0.009293 |
| ATP-2     | <i>c34e10.6</i>   | 2.0 | 0.001436 |
| ZK418.9   | <i>zk418.9</i>    | 1.9 | 0.002168 |
| C18H9.3   | <i>c18h9.3</i>    | 1.9 | 0.00231  |
| Y39B6A.33 | <i>y39b6a.33</i>  | 1.9 | 0.003169 |
| PRX-19    | <i>f54f2.8</i>    | 1.9 | 0.009167 |
| MRPS-28   | <i>y43f8c.8</i>   | 1.8 | 0.001627 |
| ACDH-7    | <i>t25g12.5</i>   | 1.8 | 0.003477 |
| Y73E7A.1  | <i>y73e7a.1</i>   | 1.8 | 0.004306 |
| DJR-1.1   | <i>b0432.2</i>    | 1.8 | 0.002247 |
| SAMS-4    | <i>c06e7.3</i>    | 1.8 | 0.009821 |
| ZK1307.8  | <i>zk1307.8</i>   | 1.8 | 0.008369 |
| PAM-1     | <i>f49e8.3</i>    | 1.8 | 0.002091 |
| F42A10.5  | <i>f42a10.5</i>   | 1.8 | 0.000797 |
| MAI-2     | <i>b0546.1</i>    | 1.8 | 0.000393 |
| TIN-13    | <i>dy3.1</i>      | 1.8 | 0.004899 |
| CTS-1     | <i>t20g5.2</i>    | 1.7 | 0.004813 |
| RPS-11    | <i>f40f11.1</i>   | 1.7 | 0.007592 |
| DPYD-1    | <i>c25f6.3</i>    | 1.7 | 0.005138 |
| PRDX-6    | <i>y38c1aa.11</i> | 1.7 | 0.006034 |
| VIG-1     | <i>f56d12.5</i>   | 1.7 | 0.000787 |
| EIF-3.J   | <i>y40b1b.5</i>   | 1.7 | 0.004354 |
| CEY-2     | <i>f46f11.2</i>   | 1.7 | 0.003555 |
| C44E4.4   | <i>c44e4.4</i>    | 1.6 | 0.00728  |
| PDI-1     | <i>c14b1.1</i>    | 1.6 | 0.008259 |
| RPS-1     | <i>f56f3.5</i>    | 1.6 | 0.008484 |
| K07C5.4   | <i>k07c5.4</i>    | 1.5 | 0.009731 |
| RPS-28    | <i>y41d4b.5</i>   | 1.5 | 0.009558 |

---

# only in the uninfected: the protein was only detected in the infected *octr-1(ok371)* animals, not in the uninfected *octr-1(ok371)* animals.



**Table S3.** Effects of knockdown of protein synthesis factors by RNAi on *C. elegans*

development

| <b>RNAi Target*</b>             | <b>Effect on wild-type worms</b>                                                                                                                                                                                                                                                                                                                                                                                             | <b>Effect on <i>octr-1(ok371)</i> worms</b>                                                                                                                                                                                                                                                                                                                                                                                  |
|---------------------------------|------------------------------------------------------------------------------------------------------------------------------------------------------------------------------------------------------------------------------------------------------------------------------------------------------------------------------------------------------------------------------------------------------------------------------|------------------------------------------------------------------------------------------------------------------------------------------------------------------------------------------------------------------------------------------------------------------------------------------------------------------------------------------------------------------------------------------------------------------------------|
| F56F3.5<br>( <i>rps-1</i> )     | After L2 larval worms fed RNAi bacterial culture for 48 hrs, the worms were normal in egg laying and development compared to worms treated with vector control RNAi.                                                                                                                                                                                                                                                         | After L2 larval worms fed RNAi bacterial culture for 48 hrs, the worms were normal in egg laying and development compared to worms treated with vector control RNAi.                                                                                                                                                                                                                                                         |
| F40F11.1<br>( <i>rps-11</i> )   | After L2 larval worms fed RNAi bacterial culture for 48 hrs, the worms displayed defective egg laying. 20 Gravid worms synchronized for 1 hr at 25°C only laid 20 eggs per worm in average while worms with empty vector control RNAi laid approximately 110 eggs per worm. The eggs from worms with <i>rps-11</i> RNAi were hatched very slowly, and development was arrested at L1 stage. Worms displayed immature oocyte. | After L2 larval worms fed RNAi bacterial culture for 48 hrs, the worms displayed defective egg laying. 20 Gravid worms synchronized for 1 hr at 25°C only laid 24 eggs per worm in average while worms with empty vector control RNAi laid approximately 110 eggs per worm. The eggs from worms with <i>rps-11</i> RNAi were hatched very slowly, and development was arrested at L1 stage. Worms displayed immature oocyte. |
| W09D10.3<br>( <i>mrpl-12</i> )  | After L2 larval worms fed RNAi bacterial culture for 48 hrs, the worms displayed normal in egg laying phenotype. These eggs hatched normally but their development was arrested at L1 stage.                                                                                                                                                                                                                                 | After L2 larval worms fed RNAi bacterial culture for 48 hrs, the worms displayed normal in egg laying phenotype. These eggs hatched normally but their development was arrested at L1 stage.                                                                                                                                                                                                                                 |
| C32E8.2<br>( <i>rpl-13</i> )    | After L2 larval worms fed RNAi bacterial culture for 48 hrs, the worms displayed defective egg laying phenotype. 20 Gravid worms synchronized for 1 hr at 25°C only laid 12 eggs per worm in average. None of the laid eggs hatched.                                                                                                                                                                                         | After L2 larval worms fed RNAi bacterial culture for 48 hrs, the worms displayed defective egg laying phenotype. 20 Gravid worms synchronized for 1 hr at 25°C only laid 14 eggs per worm in average. None of the laid eggs hatched.                                                                                                                                                                                         |
| Y45F10D.12<br>( <i>rpl-18</i> ) | After L2 larval worms fed RNAi bacterial culture for 48 hrs, the worms displayed normal in egg laying phenotype. However, few eggs hatched and development was arrested at L1-L2 stages. Worms displayed dumpy phenotype compared with worms treated with vector RNAi at same development stage.                                                                                                                             | After L2 larval worms fed RNAi bacterial culture for 48 hrs, the worms displayed normal in egg laying phenotype. However, few eggs hatched and development was arrested at L1-L2 stages. Worms displayed dumpy phenotype compared with worms treated with vector RNAi at same development stage.                                                                                                                             |
| D1007.6<br>( <i>rps-10</i> )    | After L2 larval worms fed RNAi bacterial culture for 48 hrs, the worms displayed normal in egg laying and development compared with worms treated with vector control RNAi.                                                                                                                                                                                                                                                  | After L2 larval worms fed RNAi bacterial culture for 48 hrs, the worms displayed normal in egg laying and development compared with worms treated with vector control RNAi.                                                                                                                                                                                                                                                  |

|                                |                                                                                                                                                                                              |                                                                                                                                                                                              |
|--------------------------------|----------------------------------------------------------------------------------------------------------------------------------------------------------------------------------------------|----------------------------------------------------------------------------------------------------------------------------------------------------------------------------------------------|
| K07C5.4                        | After L2 larval worms fed RNAi bacterial culture for 48 hrs, the worms displayed normal in egg laying phenotype. Few eggs were hatched, and development was arrested at L1-L2 stages.        | After L2 larval worms fed RNAi bacterial culture for 48 hrs, the worms displayed normal in egg laying phenotype. Few eggs were hatched, and development was arrested at L1-L2 stages.        |
| C27H6.2<br>( <i>ruvb-1</i> )   | After L2 larval worms fed RNAi bacterial culture for 48 hrs, the worms displayed normal in egg laying phenotype. These eggs hatched normally but their development was arrested at L1 stage. | After L2 larval worms fed RNAi bacterial culture for 48 hrs, the worms displayed normal in egg laying phenotype. These eggs hatched normally but their development was arrested at L1 stage. |
| Y40B1B.5<br>( <i>eif-3.j</i> ) | After L2 larval worms fed RNAi bacterial culture for 48 hrs, the worms displayed normal in egg laying and development compared with worms treated with vector control RNAi.                  | After L2 larval worms fed RNAi bacterial culture for 48 hrs, the worms displayed normal in egg laying and development compared with worms treated with vector control RNAi.                  |

\* Y41D4B.5 (*rps-28*) RNAi clone is not available in either Ahringer *C. elegans* RNAi library or Geneservice *C. elegans* RNAi library.
